# Supplementary material for: Nuclear translocation of fibroblast growth factor-2 (FGF2) is regulated by Karyopherin-β2 and Ran GTPase in human glioblastoma cells
Source: PubMed Central journal article supplement (PMC4673279; doi:10.18632/oncotarget.4097), 2015-05-27
Supplement: oncotarget-06-21468-s001.pdf [file oncotarget-06-21468-s001.pdf]

## SUPPLEMENTARY TABLES

**Supplementary Table S1. OD readings of media with reference FGF2 concentrations from 0 to 20 ng/mL.**

| Reference FGF2 concentration (ng/mL) | OD reading    |
|--------------------------------------|---------------|
| 0                                    | 0.027 ± 0.013 |
| 0.625                                | 0.081 ± 0.034 |
| 1.25                                 | 0.178 ± 0.048 |
| 2.5                                  | 0.383 ± 0.037 |
| 5                                    | 0.739 ± 0.044 |
| 10                                   | 1.524 ± 0.052 |
| 20                                   | 2.876 ± 0.049 |

**Supplementary Table S2. Calculated FGF2 concentration from OD readings of three experimental cell cultures transfected with empty vector, HMW-FGF2 or 18K-FGF2 respectively.** Data are shown as mean  $\pm$  SEM of three independent experiments. n.s. not significant vs empty vector.

| Plasmid transfected | OD reading               | Calculated FGF2 concentration (ng/mL) |
|---------------------|--------------------------|---------------------------------------|
| Empty vector        | 0.046 $\pm$ 0.016        | 0.198 $\pm$ 0.010                     |
| HMW-FGF2            | 0.059 $\pm$ 0.020 (n.s.) | 0.288 $\pm$ 0.018                     |
| 18K-FGF2            | 0.081 $\pm$ 0.024 (n.s.) | 0.440 $\pm$ 0.045                     |
